# Supplementary material for: Comparative analysis of mitochondrial genome between two flower color of Chrysanthemum indicum
Source: Research Square preprint supplement (doi:10.21203/rs.3.rs-7985212/v1), 2025-11-24
Supplement: Supplementary file 1 [file 6c2eae0f75fd55b5d43c51e0.docx]

Supplementary Material

# Supplementary Figures and Tables

1. **Supplementary Figures**


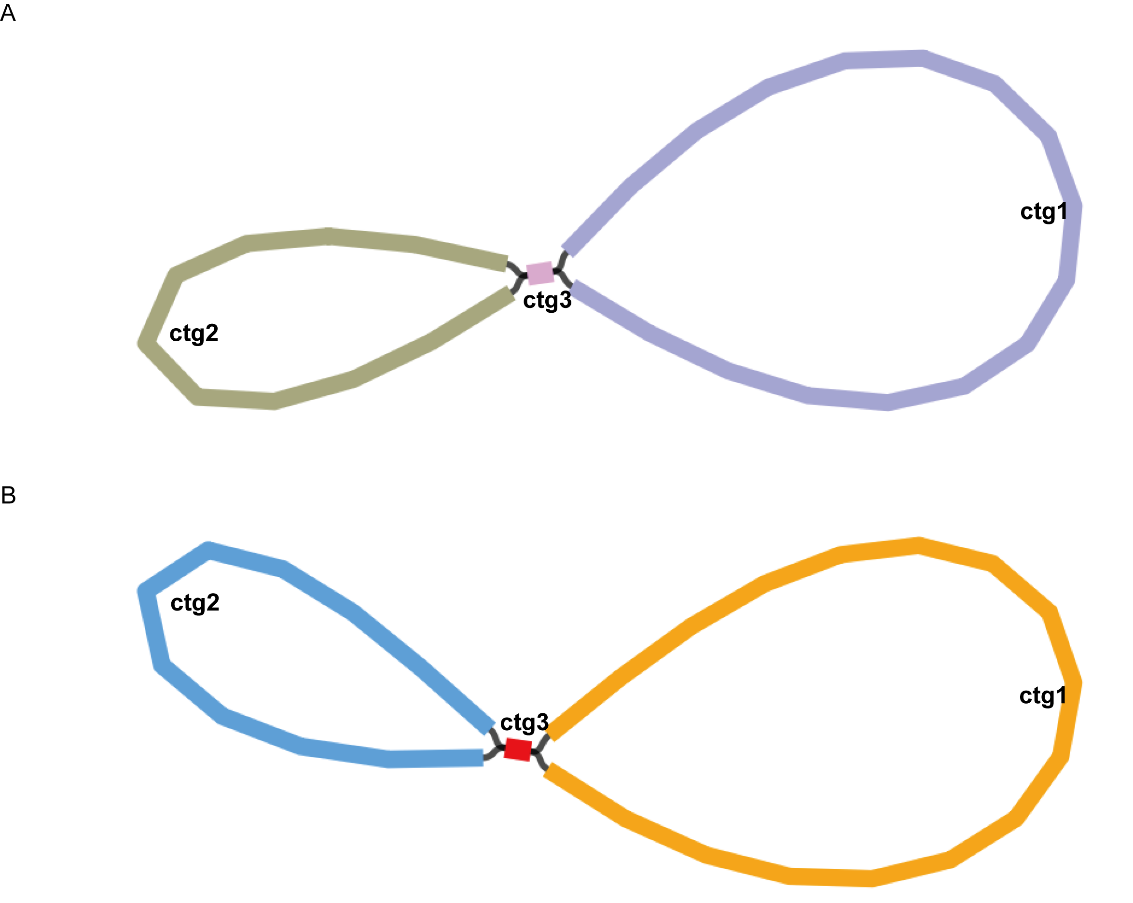


**Supplementary Figure 1.** Illustration of the mitochondrial genome in two *C. indicum* mitogenome. (A)White-rayed *C. indicum*. (B) yellow-rayed *C. indicum*.


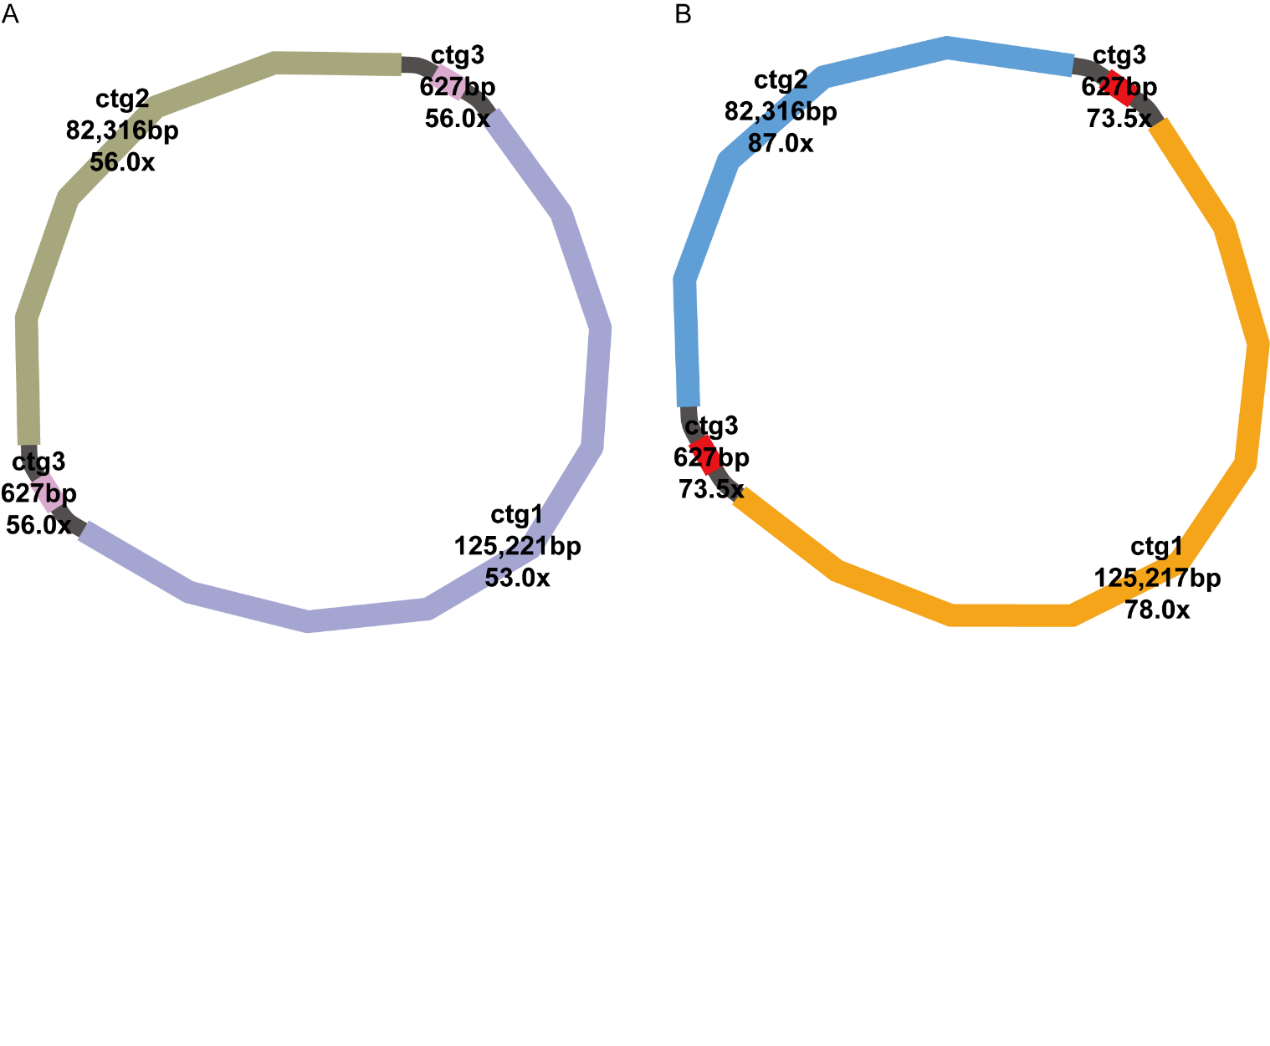


**Supplementary Figure 2.** The structure of mitochondrial genomes in two *C. indicum*. (A) white-rayed *C. indicum*. (B)yellow-rayed *C. indicum*.

## Supplementary Tables

**Supplementary Table 1.** Relative synonymous codon usage (RSCU) of each amino acid in the *C. indicum* mitogenome.

| Amino | | Codon 1 | Codon 2 | Codon 3 | Codon 4 | Codon 5 | Codon 6 |
| --- | --- | --- | --- | --- | --- | --- | --- |
| RSCU | RSCU | RSCU | RSCU | RSCU | RSCU |
| Ala | | GCU | GCA | GCC | GCG |  |  |
|  | | 1.63 | 0.99 | 0.93 | 0.45 |  |  |
| Arg | | AGA | CGA | CGU | AGG | CGG | CGC |
|  | | 1.39 | 1.33 | 1.19 | 0.75 | 0.74 | 0.61 |
| Asn | | AAU | AAC |  |  |  |  |
| 1.38 | 0.62 |  |  |  |  |
| Asp | | GAU | GAC |  |  |  |  |
| 1.33 | 0.67 |  |  |  |  |
| Cys | | UGU | UGC |  |  |  |  |
| 1.22 | 0.78 |  |  |  |  |
| End | | UAA | UAG | UGA |  |  |  |
| 1.6 | 0.8 | 0.6 |  |  |  |
| Gln | | CAA | CAG |  |  |  |  |
| 1.52 | 0.48 |  |  |  |  |
| Glu | | GAA | GAG |  |  |  |  |
| 1.41 | 0.59 |  |  |  |  |
| Gly | | GGA | GGU | GGG | GGC |  |  |
| 1.43 | 1.3 | 0.77 | 0.49 |  |  |
| His | | CAU | CAC |  |  |  |  |
| 1.53 | 0.47 |  |  |  |  |
| Ile | | AUU | AUA | AUC |  |  |  |
| 1.31 | 0.84 | 0.84 |  |  |  |
| Leu | | UUA | CUU | UUG | CUA | CUC | CUG |
| 1.48 | 1.29 | 1.2 | 0.95 | 0.56 | 0.52 |
| Lys | | AAA | AAG |  |  |  |  |
| 1.19 | 0.81 |  |  |  |  |
| Met | | AUG |  |  |  |  |  |
| 1 |  |  |  |  |  |
| Phe | | UUU | UUC |  |  |  |  |
| 1.12 | 0.88 |  |  |  |  |
| Pro | | CCU | CCA | CCC | CCG |  |  |
| 1.42 | 1.14 | 0.77 | 0.68 |  |  |
| Ser | | UCU | UCA | AGU | UCC | UCG | AGC |
| 1.46 | 1.17 | 1.08 | 0.89 | 0.78 | 0.62 |
| Thr | | ACU | ACC | ACA | ACG |  |  |
| 1.42 | 1.02 | 1 | 0.56 |  |  |
| Trp | UGG  1 | |  |  |  | | |
| Tyr | UAU | | UAC |  |  | | |
| 1.53 | | 0.47 |  |  | | |
| Val | GUU | | GUA | GUG | GUC | | |
|  | 1.18 | | 1.17 | 0.88 | 0.77 | | |

**Supplementary Table 2.** Mitochondrial genome SSRs in white-rayed *C. indicum*.

| Mitochondrial genome | SSR nr. | SSR type | SSR | size | start | end |
| --- | --- | --- | --- | --- | --- | --- |
| mtDNA | 1 | p4 | (TTCC)3 | 12 | 2683 | 2694 |
| mtDNA | 2 | p4 | (ATGA)3 | 12 | 3133 | 3144 |
| mtDNA | 3 | p1 | (A)11 | 11 | 9843 | 9853 |
| mtDNA | 4 | p4 | (ATTG)3 | 12 | 9940 | 9951 |
| mtDNA | 5 | p1 | (A)10 | 10 | 9977 | 9986 |
| mtDNA | 6 | p4 | (CGCC)3 | 12 | 11550 | 11561 |
| mtDNA | 7 | p1 | (T)10 | 10 | 21209 | 21218 |
| mtDNA | 8 | p4 | (TCTT)4 | 16 | 24892 | 24907 |
| mtDNA | 9 | p4 | (TTAA)4 | 16 | 25888 | 25903 |
| mtDNA | 10 | p1 | (T)10 | 10 | 26071 | 26080 |
| mtDNA | 11 | p4 | (CGGG)3 | 12 | 32756 | 32767 |
| mtDNA | 12 | p2 | (AG)5 | 10 | 48620 | 48629 |
| mtDNA | 13 | p1 | (G)12 | 12 | 49267 | 49278 |
| mtDNA | 14 | p2 | (CT)5 | 10 | 50844 | 50853 |
| mtDNA | 15 | p1 | (T)13 | 13 | 52528 | 52540 |
| mtDNA | 16 | p1 | (T)14 | 14 | 55889 | 55902 |
| mtDNA | 17 | p2 | (TA)5 | 10 | 59351 | 59360 |
| mtDNA | 18 | p1 | (T)11 | 11 | 59674 | 59684 |
| mtDNA | 19 | p4 | (TTGG)3 | 12 | 60377 | 60388 |
| mtDNA | 20 | p1 | (T)10 | 10 | 61506 | 61515 |
| mtDNA | 21 | p4 | (GCCG)3 | 12 | 65582 | 65593 |
| mtDNA | 22 | p1 | (T)10 | 10 | 68985 | 68994 |
| mtDNA | 23 | p3 | (GAA)4 | 12 | 69424 | 69435 |
| mtDNA | 24 | p4 | (GGCC)3 | 12 | 76668 | 76679 |
| mtDNA | 25 | p1 | (T)11 | 11 | 76846 | 76856 |
| mtDNA | 26 | p4 | (ACCG)3 | 12 | 87642 | 87653 |
| mtDNA | 27 | p1 | (C)10 | 10 | 88010 | 88019 |
| mtDNA | 28 | p4 | (TCAT)3 | 12 | 88666 | 88677 |
| mtDNA | 29 | p4 | (AGAA)3 | 12 | 88889 | 88900 |
| mtDNA | 30 | p1 | (A)11 | 11 | 88906 | 88916 |
| mtDNA | 31 | p2 | (GA)5 | 10 | 96409 | 96418 |
| mtDNA | 32 | p4 | (AATG)3 | 12 | 98901 | 98912 |
| mtDNA | 33 | p3 | (AAG)4 | 12 | 108617 | 108628 |
| mtDNA | 34 | p4 | (AAAT)4 | 16 | 112162 | 112177 |
| mtDNA | 35 | p1 | (A)11 | 11 | 112647 | 112657 |
| mtDNA | 36 | p4 | (GACC)3 | 12 | 115926 | 115937 |
| mtDNA | 37 | p2 | (TA)5 | 10 | 121178 | 121187 |
| mtDNA | 38 | p1 | (T)10 | 10 | 124390 | 124399 |
| mtDNA | 39 | p1 | (G)13 | 13 | 124516 | 124528 |
| mtDNA | 40 | p5 | (TCCTT)3 | 15 | 125801 | 125815 |
| mtDNA | 41 | p2 | (GA)6 | 12 | 126307 | 126318 |
| mtDNA | 42 | p4 | (ATAA)3 | 12 | 131893 | 131904 |
| mtDNA | 43 | p2 | (TC)5 | 10 | 134918 | 134927 |
| mtDNA | 44 | p6 | (GGTGAG)3 | 18 | 134935 | 134952 |
| mtDNA | 45 | p4 | (TTCG)3 | 12 | 136506 | 136517 |
| mtDNA | 46 | p5 | (CTAGT)3 | 15 | 141847 | 141861 |
| mtDNA | 47 | p1 | (T)13 | 13 | 144212 | 144224 |
| mtDNA | 48 | p1 | (A)10 | 10 | 147684 | 147693 |
| mtDNA | 49 | p3 | (TTC)4 | 12 | 151197 | 151208 |
| mtDNA | 50 | p5 | (ATATT)3 | 15 | 152021 | 152035 |
| mtDNA | 51 | p4 | (AATC)3 | 12 | 154464 | 154475 |
| mtDNA | 52 | p4 | (AAGC)3 | 12 | 157367 | 157378 |
| mtDNA | 53 | p4 | (GGGC)3 | 12 | 160337 | 160348 |
| mtDNA | 54 | p4 | (TTAC)4 | 16 | 163506 | 163521 |
| mtDNA | 55 | p2 | (TA)6 | 12 | 170964 | 170975 |
| mtDNA | 56 | p2 | (CT)5 | 10 | 171798 | 171807 |
| mtDNA | 57 | p2 | (GA)5 | 10 | 173678 | 173687 |
| mtDNA | 58 | p4 | (TTTC)3 | 12 | 177781 | 177792 |
| mtDNA | 59 | p1 | (A)10 | 10 | 179274 | 179283 |
| mtDNA | 60 | p1 | (T)10 | 10 | 190442 | 190451 |
| mtDNA | 61 | p4 | (TTCA)3 | 12 | 190530 | 190541 |
| mtDNA | 62 | p1 | (T)10 | 10 | 195136 | 195145 |
| mtDNA | 63 | p1 | (A)10 | 10 | 195735 | 195744 |
| mtDNA | 64 | p1 | (A)14 | 14 | 199889 | 199902 |
| mtDNA | 65 | p4 | (GCAA)3 | 12 | 201790 | 201801 |

**Supplementary Table 3.** Mitochondrial genome SSRs in yellow-rayed *C. indicum*.

| Mitochondrial genome | SSR nr. | SSR type | SSR | size | start | end |
| --- | --- | --- | --- | --- | --- | --- |
| mtDNA | 1 | p4 | (TTCC)3 | 12 | 2683 | 2694 |
| mtDNA | 2 | p4 | (ATGA)3 | 12 | 3133 | 3144 |
| mtDNA | 3 | p1 | (A)11 | 11 | 9843 | 9853 |
| mtDNA | 4 | p4 | (ATTG)3 | 12 | 9940 | 9951 |
| mtDNA | 5 | p1 | (A)11 | 11 | 9977 | 9987 |
| mtDNA | 6 | p4 | (CGCC)3 | 12 | 11551 | 11562 |
| mtDNA | 7 | p1 | (T)10 | 10 | 21210 | 21219 |
| mtDNA | 8 | p4 | (TCTT)4 | 16 | 24893 | 24908 |
| mtDNA | 9 | p4 | (TTAA)4 | 16 | 25889 | 25904 |
| mtDNA | 10 | p1 | (T)10 | 10 | 26072 | 26081 |
| mtDNA | 11 | p4 | (CGGG)3 | 12 | 32757 | 32768 |
| mtDNA | 12 | p2 | (AG)5 | 10 | 48621 | 48630 |
| mtDNA | 13 | p1 | (G)12 | 12 | 49268 | 49279 |
| mtDNA | 14 | p2 | (CT)5 | 10 | 50845 | 50854 |
| mtDNA | 15 | p1 | (T)13 | 13 | 52529 | 52541 |
| mtDNA | 16 | p1 | (T)14 | 14 | 55890 | 55903 |
| mtDNA | 17 | p2 | (TA)5 | 10 | 59352 | 59361 |
| mtDNA | 18 | p1 | (T)11 | 11 | 59675 | 59685 |
| mtDNA | 19 | p4 | (TTGG)3 | 12 | 60378 | 60389 |
| mtDNA | 20 | p1 | (T)10 | 10 | 61507 | 61516 |
| mtDNA | 21 | p4 | (GCCG)3 | 12 | 65583 | 65594 |
| mtDNA | 22 | p1 | (T)10 | 10 | 68986 | 68995 |
| mtDNA | 23 | p3 | (GAA)4 | 12 | 69425 | 69436 |
| mtDNA | 24 | p4 | (GGCC)3 | 12 | 76669 | 76680 |
| mtDNA | 25 | p1 | (T)11 | 11 | 76847 | 76857 |
| mtDNA | 26 | p4 | (ACCG)3 | 12 | 87643 | 87654 |
| mtDNA | 27 | p1 | (C)10 | 10 | 88011 | 88020 |
| mtDNA | 28 | p4 | (TCAT)3 | 12 | 88667 | 88678 |
| mtDNA | 29 | p4 | (AGAA)3 | 12 | 88890 | 88901 |
| mtDNA | 30 | p1 | (A)11 | 11 | 88907 | 88917 |
| mtDNA | 31 | p2 | (GA)5 | 10 | 96410 | 96419 |
| mtDNA | 32 | p4 | (AATG)3 | 12 | 98902 | 98913 |
| mtDNA | 33 | p3 | (AAG)4 | 12 | 108618 | 108629 |
| mtDNA | 34 | p4 | (AAAT)4 | 16 | 112163 | 112178 |
| mtDNA | 35 | p1 | (A)11 | 11 | 112648 | 112658 |
| mtDNA | 36 | p4 | (GACC)3 | 12 | 115927 | 115938 |
| mtDNA | 37 | p2 | (TA)5 | 10 | 121179 | 121188 |
| mtDNA | 38 | p1 | (T)10 | 10 | 124391 | 124400 |
| mtDNA | 39 | p1 | (G)13 | 13 | 124517 | 124529 |
| mtDNA | 40 | p5 | (TCCTT)3 | 15 | 125802 | 125816 |
| mtDNA | 41 | p2 | (GA)6 | 12 | 126308 | 126319 |
| mtDNA | 42 | p4 | (ATAA)3 | 12 | 131894 | 131905 |
| mtDNA | 43 | p2 | (TC)5 | 10 | 134919 | 134928 |
| mtDNA | 44 | p6 | (GGTGAG)3 | 18 | 134936 | 134953 |
| mtDNA | 45 | p4 | (TTCG)3 | 12 | 136507 | 136518 |
| mtDNA | 46 | p5 | (CTAGT)3 | 15 | 141848 | 141862 |
| mtDNA | 47 | p1 | (T)13 | 13 | 144213 | 144225 |
| mtDNA | 48 | p1 | (A)10 | 10 | 147685 | 147694 |
| mtDNA | 49 | p3 | (TTC)4 | 12 | 151198 | 151209 |
| mtDNA | 50 | p5 | (ATATT)3 | 15 | 152022 | 152036 |
| mtDNA | 51 | p4 | (AATC)3 | 12 | 154465 | 154476 |
| mtDNA | 52 | p4 | (AAGC)3 | 12 | 157368 | 157379 |
| mtDNA | 53 | p4 | (GGGC)3 | 12 | 160338 | 160349 |
| mtDNA | 54 | p4 | (TTAC)4 | 16 | 163507 | 163522 |
| mtDNA | 55 | p2 | (TA)6 | 12 | 170965 | 170976 |
| mtDNA | 56 | p2 | (CT)5 | 10 | 171799 | 171808 |
| mtDNA | 57 | p2 | (GA)5 | 10 | 173679 | 173688 |
| mtDNA | 58 | p4 | (TTTC)3 | 12 | 177782 | 177793 |
| mtDNA | 59 | p1 | (A)10 | 10 | 179270 | 179279 |
| mtDNA | 60 | p1 | (T)10 | 10 | 190438 | 190447 |
| mtDNA | 61 | p4 | (TTCA)3 | 12 | 190526 | 190537 |
| mtDNA | 62 | p1 | (T)10 | 10 | 195132 | 195141 |
| mtDNA | 63 | p1 | (A)10 | 10 | 195731 | 195740 |
| mtDNA | 64 | p1 | (A)14 | 14 | 199885 | 199898 |
| mtDNA | 65 | p4 | (GCAA)3 | 12 | 201786 | 201797 |

**Supplementary Table 4.** Tandem repeats within the mitochondrial genome of white-rayed *C. indicum*.

| Indices | Period Size | | Copy  Number | Consensus Size | Percent Matches | Percent Indels | Score | A | C | G | T | Entropy (0-2) |
| --- | --- | --- | --- | --- | --- | --- | --- | --- | --- | --- | --- | --- |
| 321--370 | | 25 | 2 | 25 | 100 | 0 | 100 | 36 | 24 | 16 | 24 | 1.94 |
| 8018--8116 | | 21 | 5 | 20 | 76 | 13 | 89 | 51 | 13 | 24 | 11 | 1.73 |
| 8032--8116 | | 21 | 4.2 | 20 | 79 | 8 | 109 | 51 | 12 | 24 | 10 | 1.71 |
| 17571--17645 | | 38 | 2 | 38 | 92 | 2 | 125 | 28 | 18 | 22 | 30 | 1.97 |
| 18826--18861 | | 18 | 2 | 18 | 94 | 0 | 63 | 22 | 30 | 13 | 33 | 1.93 |
| 21360--21397 | | 20 | 1.9 | 20 | 84 | 10 | 51 | 55 | 13 | 7 | 23 | 1.64 |
| 32150--32205 | | 28 | 2 | 28 | 100 | 0 | 112 | 50 | 7 | 21 | 21 | 1.72 |
| 81807--81885 | | 39 | 2 | 39 | 95 | 0 | 140 | 22 | 27 | 17 | 31 | 1.97 |
| 91283--91392 | | 36 | 3.1 | 36 | 100 | 0 | 220 | 16 | 45 | 24 | 13 | 1.83 |
| 91883--92065 | | 61 | 3 | 61 | 100 | 0 | 366 | 19 | 14 | 18 | 47 | 1.82 |
| 93383--93424 | | 19 | 2.2 | 19 | 91 | 0 | 66 | 21 | 14 | 11 | 52 | 1.73 |
| 125434--125506 | | 36 | 2 | 36 | 100 | 0 | 146 | 28 | 19 | 21 | 30 | 1.98 |
| 147932--147971 | | 16 | 2.6 | 16 | 88 | 4 | 55 | 5 | 30 | 27 | 37 | 1.78 |
| 158308--158348 | | 20 | 2 | 20 | 86 | 9 | 57 | 53 | 2 | 21 | 21 | 1.57 |
| 173246--173285 | | 18 | 2.2 | 18 | 86 | 0 | 53 | 45 | 25 | 25 | 5 | 1.73 |
| 205839--205881 | | 18 | 2.4 | 18 | 81 | 18 | 54 | 18 | 20 | 25 | 34 | 1.96 |
| 207492--207535 | | 21 | 2.1 | 21 | 91 | 0 | 70 | 27 | 20 | 13 | 38 | 1.9 |

**Supplementary Table 5.** Tandem repeats within the mitochondrial genome of yellow-rayed *C. indicum*.

| Indices | Period Size | Copy Number | Consensus  Size | Percent  Matches | Percent  Indels | Score | A | C | G | T |
| --- | --- | --- | --- | --- | --- | --- | --- | --- | --- | --- |
| 321--370 | 25 | 2 | 25 | 100 | 0 | 100 | 36 | 24 | 16 | 24 |
| 8018--8116 | 21 | 5 | 20 | 76 | 13 | 89 | 51 | 13 | 24 | 11 |
| 8032--8116 | 21 | 4.2 | 20 | 79 | 8 | 109 | 51 | 12 | 24 | 10 |
| 17572--17646 | 38 | 2 | 38 | 92 | 2 | 125 | 28 | 18 | 22 | 30 |
| 18827--18862 | 18 | 2 | 18 | 94 | 0 | 63 | 22 | 30 | 13 | 33 |
| 21361--21398 | 20 | 1.9 | 20 | 84 | 10 | 51 | 55 | 13 | 7 | 23 |
| 32151--32206 | 28 | 2 | 28 | 100 | 0 | 112 | 50 | 7 | 21 | 21 |
| 81808--81886 | 39 | 2 | 39 | 95 | 0 | 140 | 22 | 27 | 17 | 31 |
| 91284--91393 | 36 | 3.1 | 36 | 100 | 0 | 220 | 16 | 45 | 24 | 13 |
| 91884--92066 | 61 | 3 | 61 | 100 | 0 | 366 | 19 | 14 | 18 | 47 |
| 93384--93425 | 19 | 2.2 | 19 | 91 | 0 | 66 | 21 | 14 | 11 | 52 |
| 125435--125507 | 36 | 2 | 36 | 100 | 0 | 146 | 28 | 19 | 21 | 30 |
| 147933--147972 | 16 | 2.6 | 16 | 88 | 4 | 55 | 5 | 30 | 27 | 37 |
| 158309--158349 | 20 | 2 | 20 | 86 | 9 | 57 | 53 | 2 | 21 | 21 |
| 173247--173286 | 18 | 2.2 | 18 | 86 | 0 | 53 | 45 | 25 | 25 | 5 |
| 205835--205877 | 18 | 2.4 | 18 | 81 | 18 | 54 | 18 | 20 | 25 | 34 |
| 207488--207531 | 21 | 2.1 | 21 | 91 | 0 | 70 | 27 | 20 | 13 | 38 |

**Supplementary Table 6.** Dispersed repeat sequences within the mitochondrial genome of white-rayed *C. indicum*.

| The repeat length of the first part | The starting site of the first part | Matching direction | The repeat length of the second part | The starting site of the second part | Interval distance of repeats | E-value |
| --- | --- | --- | --- | --- | --- | --- |
| 627 | 27413 | P | 627 | 110356 | 0 | 0.00E+00 |
| 396 | 77535 | P | 396 | 90483 | 0 | 4.71E-229 |
| 250 | 16338 | F | 250 | 89990 | 0 | 3.75E-141 |
| 246 | 39304 | P | 246 | 91697 | 0 | 9.59E-139 |
| 231 | 38742 | P | 231 | 92075 | 0 | 1.03E-129 |
| 228 | 61638 | F | 228 | 159129 | 0 | 6.59E-128 |
| 222 | 75977 | P | 222 | 90883 | 0 | 2.70E-124 |
| 179 | 10084 | F | 179 | 106385 | 0 | 2.09E-98 |
| 181 | 109573 | P | 181 | 124110 | -3 | 3.43E-92 |
| 166 | 77999 | P | 166 | 90225 | -2 | 1.73E-85 |
| 147 | 109607 | P | 147 | 124110 | -1 | 1.70E-76 |
| 133 | 109621 | P | 133 | 124110 | 0 | 1.03E-70 |
| 122 | 91882 | F | 122 | 91943 | 0 | 4.34E-64 |
| 126 | 102723 | P | 126 | 133038 | -3 | 1.49E-59 |
| 113 | 13434 | F | 113 | 101282 | 0 | 1.14E-58 |
| 98 | 132707 | P | 98 | 176865 | 0 | 1.22E-49 |
| 97 | 28560 | F | 97 | 155573 | 0 | 4.88E-49 |
| 99 | 90405 | P | 99 | 151060 | -2 | 1.33E-45 |
| 91 | 102758 | P | 91 | 133038 | -1 | 5.46E-43 |
| 83 | 90421 | P | 83 | 151060 | 0 | 1.31E-40 |
| 86 | 102619 | P | 86 | 133182 | -3 | 5.66E-36 |
| 86 | 102780 | P | 86 | 133021 | -3 | 5.66E-36 |
| 78 | 8762 | P | 78 | 21869 | -1 | 3.14E-35 |
| 74 | 91282 | F | 74 | 91318 | 0 | 3.44E-35 |
| 71 | 39294 | P | 71 | 92004 | 0 | 2.20E-33 |
| 77 | 75881 | P | 77 | 91115 | -2 | 1.41E-32 |
| 76 | 41021 | F | 76 | 183550 | -3 | 4.08E-30 |
| 64 | 29037 | P | 64 | 41036 | 0 | 3.60E-29 |
| 71 | 90963 | F | 71 | 155657 | -2 | 4.92E-29 |
| 62 | 76048 | P | 62 | 155666 | 0 | 5.76E-28 |
| 62 | 90972 | F | 62 | 155666 | 0 | 5.76E-28 |
| 61 | 39304 | P | 61 | 91943 | 0 | 2.31E-27 |
| 61 | 91882 | F | 61 | 92004 | 0 | 2.31E-27 |
| 61 | 107144 | P | 61 | 180839 | 0 | 2.31E-27 |
| 59 | 8781 | P | 59 | 21869 | 0 | 3.69E-26 |
| 68 | 75898 | P | 68 | 91107 | -3 | 1.90E-25 |
| 57 | 102923 | P | 57 | 132910 | 0 | 5.90E-25 |
| 63 | 41034 | F | 63 | 183563 | -2 | 2.53E-24 |
| 58 | 29040 | P | 58 | 183568 | -1 | 2.57E-23 |
| 64 | 102715 | P | 64 | 133108 | -3 | 4.05E-23 |
| 57 | 133245 | F | 57 | 183068 | -1 | 1.01E-22 |
| 52 | 40967 | P | 52 | 143937 | 0 | 6.05E-22 |
| 61 | 60186 | F | 61 | 92872 | -3 | 2.24E-21 |
| 49 | 40345 | P | 49 | 162341 | 0 | 3.87E-20 |
| 49 | 53089 | P | 49 | 124064 | 0 | 3.87E-20 |
| 49 | 71234 | P | 49 | 160939 | 0 | 3.87E-20 |
| 57 | 102654 | P | 57 | 133176 | -3 | 4.66E-19 |
| 50 | 110991 | P | 50 | 159557 | -1 | 1.45E-18 |
| 49 | 89334 | F | 49 | 89461 | -1 | 5.69E-18 |
| 50 | 60274 | P | 50 | 176603 | -2 | 1.07E-16 |
| 43 | 11027 | P | 43 | 159493 | 0 | 1.58E-16 |
| 43 | 172594 | F | 43 | 177864 | 0 | 1.58E-16 |
| 46 | 73351 | F | 46 | 171644 | -1 | 3.42E-16 |
| 46 | 167903 | P | 46 | 176796 | -1 | 3.42E-16 |
| 52 | 40086 | P | 52 | 138507 | -3 | 3.61E-16 |
| 52 | 40100 | P | 52 | 138493 | -3 | 3.61E-16 |
| 42 | 44474 | F | 42 | 123393 | 0 | 6.34E-16 |
| 41 | 60202 | F | 41 | 92888 | 0 | 2.54E-15 |
| 40 | 69706 | F | 40 | 137468 | 0 | 1.01E-14 |
| 40 | 111001 | P | 40 | 159557 | 0 | 1.01E-14 |
| 39 | 69154 | P | 39 | 116867 | 0 | 4.06E-14 |
| 38 | 72624 | P | 38 | 74620 | 0 | 1.62E-13 |
| 38 | 91282 | F | 38 | 91354 | 0 | 1.62E-13 |
| 41 | 36246 | P | 41 | 125073 | -1 | 3.12E-13 |
| 41 | 88978 | F | 41 | 187318 | -1 | 3.12E-13 |
| 37 | 18094 | F | 37 | 190790 | 0 | 6.49E-13 |
| 37 | 89346 | F | 37 | 89473 | 0 | 6.49E-13 |
| 37 | 125433 | F | 37 | 125469 | 0 | 6.49E-13 |
| 35 | 60289 | P | 35 | 176603 | 0 | 1.04E-11 |
| 34 | 50844 | P | 34 | 50844 | 0 | 4.15E-11 |
| 43 | 62480 | F | 43 | 142932 | -3 | 5.28E-11 |
| 43 | 63271 | P | 43 | 100209 | -3 | 5.28E-11 |
| 43 | 102867 | P | 43 | 132977 | -3 | 5.28E-11 |
| 43 | 184365 | P | 43 | 190677 | -3 | 5.28E-11 |
| 40 | 3787 | F | 40 | 190030 | -2 | 7.12E-11 |
| 40 | 78036 | F | 40 | 151213 | -2 | 7.12E-11 |
| 40 | 81806 | F | 40 | 81845 | -2 | 7.12E-11 |
| 40 | 90314 | P | 40 | 151213 | -2 | 7.12E-11 |
| 37 | 147650 | F | 37 | 177895 | -1 | 7.20E-11 |
| 33 | 28473 | P | 33 | 69095 | 0 | 1.66E-10 |
| 42 | 51210 | F | 42 | 142514 | -3 | 1.96E-10 |
| 36 | 102675 | P | 36 | 133176 | -1 | 2.80E-10 |
| 36 | 103051 | P | 36 | 132798 | -1 | 2.80E-10 |
| 38 | 16474 | P | 38 | 201994 | -2 | 1.03E-09 |
| 38 | 90126 | P | 38 | 201994 | -2 | 1.03E-09 |
| 35 | 73492 | F | 35 | 101221 | -1 | 1.09E-09 |
| 31 | 17199 | F | 31 | 89562 | 0 | 2.66E-09 |
| 40 | 90376 | P | 40 | 132754 | -3 | 2.71E-09 |
| 40 | 90376 | F | 40 | 176876 | -3 | 2.71E-09 |
| 40 | 177812 | F | 40 | 184350 | -3 | 2.71E-09 |
| 37 | 40115 | P | 37 | 138493 | -2 | 3.89E-09 |
| 39 | 61847 | F | 39 | 203230 | -3 | 1E-08 |
| 39 | 102988 | P | 39 | 132863 | -3 | 1E-08 |
| 30 | 11600 | P | 30 | 41700 | 0 | 1.06E-08 |
| 30 | 26409 | P | 30 | 137390 | 0 | 1.06E-08 |
| 30 | 42591 | P | 30 | 148471 | 0 | 1.06E-08 |
| 30 | 55894 | P | 30 | 57635 | 0 | 1.06E-08 |
| 33 | 11273 | F | 33 | 137789 | -1 | 1.65E-08 |
| 38 | 62203 | F | 38 | 79350 | -3 | 3.7E-08 |
| 38 | 73726 | F | 38 | 132795 | -3 | 3.7E-08 |
| 32 | 78044 | F | 32 | 151221 | -1 | 6.38E-08 |
| 37 | 77910 | F | 37 | 151060 | -3 | 1.36E-07 |
| 34 | 5871 | F | 34 | 21470 | -2 | 2.1E-07 |
| 34 | 12210 | F | 34 | 142147 | -2 | 2.1E-07 |
| 34 | 13048 | F | 34 | 38401 | -2 | 2.1E-07 |
| 34 | 63299 | P | 34 | 100190 | -2 | 2.1E-07 |
| 34 | 73730 | P | 34 | 103052 | -2 | 2.1E-07 |
| 31 | 8363 | F | 31 | 22286 | -1 | 2.47E-07 |
| 31 | 99810 | F | 31 | 142244 | -1 | 2.47E-07 |
| 36 | 90368 | P | 36 | 132766 | -3 | 5.01E-07 |
| 36 | 90368 | F | 36 | 176868 | -3 | 5.01E-07 |
| 30 | 12244 | F | 30 | 189553 | -1 | 9.57E-07 |
| 30 | 26603 | F | 30 | 144102 | -1 | 9.57E-07 |
| 35 | 47552 | F | 35 | 71554 | -3 | 1.84E-06 |
| 32 | 90374 | P | 32 | 151153 | -2 | 2.97E-06 |
| 32 | 100186 | P | 32 | 117118 | -2 | 2.97E-06 |
| 32 | 111104 | F | 32 | 133385 | -2 | 2.97E-06 |
| 34 | 30503 | F | 34 | 32323 | -3 | 6.71E-06 |
| 34 | 60382 | F | 34 | 176552 | -3 | 6.71E-06 |
| 34 | 137786 | P | 34 | 138558 | -3 | 6.71E-06 |
| 31 | 61855 | F | 31 | 203238 | -2 | 0.0000111 |
| 31 | 61911 | F | 31 | 203275 | -2 | 0.0000111 |
| 31 | 81101 | R | 31 | 81101 | -2 | 0.0000111 |
| 31 | 102879 | P | 31 | 132977 | -2 | 0.0000111 |
| 31 | 117905 | F | 31 | 192419 | -2 | 0.0000111 |
| 31 | 132824 | F | 31 | 182903 | -2 | 0.0000111 |
| 31 | 169892 | P | 31 | 207273 | -2 | 0.0000111 |
| 30 | 8035 | F | 30 | 8056 | -2 | 0.0000416 |
| 30 | 32149 | F | 30 | 32177 | -2 | 0.0000416 |
| 30 | 62260 | F | 30 | 79407 | -2 | 0.0000416 |
| 30 | 62493 | F | 30 | 142945 | -2 | 0.0000416 |
| 30 | 72732 | P | 30 | 141994 | -2 | 0.0000416 |
| 30 | 90386 | P | 30 | 132754 | -2 | 0.0000416 |
| 30 | 90386 | F | 30 | 176886 | -2 | 0.0000416 |
| 30 | 142900 | P | 30 | 201270 | -2 | 0.0000416 |
| 32 | 35511 | F | 32 | 201987 | -3 | 0.000089 |
| 31 | 11598 | P | 31 | 157490 | -3 | 0.000323 |
| 31 | 12218 | F | 31 | 70644 | -3 | 0.000323 |
| 31 | 63302 | F | 31 | 117115 | -3 | 0.000323 |
| 31 | 70170 | F | 31 | 143319 | -3 | 0.000323 |
| 31 | 102855 | P | 31 | 133001 | -3 | 0.000323 |
| 31 | 184380 | P | 31 | 190674 | -3 | 0.000323 |
| 30 | 11317 | P | 30 | 204704 | -3 | 0.00117 |
| 30 | 17223 | F | 30 | 89545 | -3 | 0.00117 |
| 30 | 26091 | F | 30 | 194959 | -3 | 0.00117 |
| 30 | 70877 | F | 30 | 177996 | -3 | 0.00117 |
| 30 | 102613 | P | 30 | 183067 | -3 | 0.00117 |
| 30 | 137841 | P | 30 | 176581 | -3 | 0.00117 |
| 30 | 177827 | P | 30 | 190690 | -3 | 0.00117 |

**Supplementary Table 7.** Dispersed repeat sequences within the mitogenome of yellow-rayed *C. indicum*.

| The repeat length of the first part | The starting site of the first part | Matching direction | | The repeat length of the second part | The starting site of the second part | Interval distance of repeats | | E-value |
| --- | --- | --- | --- | --- | --- | --- | --- | --- |
| 627 | 27414 | | P | 627 | 110357 | 0 | 0.00E+00 | |
| 396 | 77536 | | P | 396 | 90484 | 0 | 4.71E-229 | |
| 250 | 16339 | | F | 250 | 89991 | 0 | 3.75E-141 | |
| 246 | 39305 | | P | 246 | 91698 | 0 | 9.59E-139 | |
| 231 | 38743 | | P | 231 | 92076 | 0 | 1.03E-129 | |
| 228 | 61639 | | F | 228 | 159130 | 0 | 6.59E-128 | |
| 222 | 75978 | | P | 222 | 90884 | 0 | 2.70E-124 | |
| 179 | 10085 | | F | 179 | 106386 | 0 | 2.09E-98 | |
| 181 | 109574 | | P | 181 | 124111 | -3 | 3.42E-92 | |
| 166 | 78000 | | P | 166 | 90226 | -2 | 1.73E-85 | |
| 147 | 109608 | | P | 147 | 124111 | -1 | 1.70E-76 | |
| 133 | 109622 | | P | 133 | 124111 | 0 | 1.03E-70 | |
| 122 | 91883 | | F | 122 | 91944 | 0 | 4.34E-64 | |
| 126 | 102724 | | P | 126 | 133039 | -3 | 1.49E-59 | |
| 113 | 13435 | | F | 113 | 101283 | 0 | 1.14E-58 | |
| 98 | 132708 | | P | 98 | 176866 | 0 | 1.22E-49 | |
| 97 | 28561 | | F | 97 | 155574 | 0 | 4.88E-49 | |
| 99 | 90406 | | P | 99 | 151061 | -2 | 1.33E-45 | |
| 91 | 102759 | | P | 91 | 133039 | -1 | 5.46E-43 | |
| 83 | 90422 | | P | 83 | 151061 | 0 | 1.31E-40 | |
| 86 | 102620 | | P | 86 | 133183 | -3 | 5.66E-36 | |
| 86 | 102781 | | P | 86 | 133022 | -3 | 5.66E-36 | |
| 78 | 8762 | | P | 78 | 21870 | -1 | 3.14E-35 | |
| 74 | 91283 | | F | 74 | 91319 | 0 | 3.44E-35 | |
| 71 | 39295 | | P | 71 | 92005 | 0 | 2.20E-33 | |
| 77 | 75882 | | P | 77 | 91116 | -2 | 1.41E-32 | |
| 76 | 41022 | | F | 76 | 183546 | -3 | 4.08E-30 | |
| 64 | 29038 | | P | 64 | 41037 | 0 | 3.60E-29 | |
| 71 | 90964 | | F | 71 | 155658 | -2 | 4.92E-29 | |
| 62 | 76049 | | P | 62 | 155667 | 0 | 5.76E-28 | |
| 62 | 90973 | | F | 62 | 155667 | 0 | 5.76E-28 | |
| 61 | 39305 | | P | 61 | 91944 | 0 | 2.31E-27 | |
| 61 | 91883 | | F | 61 | 92005 | 0 | 2.31E-27 | |
| 61 | 107145 | | P | 61 | 180835 | 0 | 2.31E-27 | |
| 59 | 8781 | | P | 59 | 21870 | 0 | 3.69E-26 | |
| 68 | 75899 | | P | 68 | 91108 | -3 | 1.90E-25 | |
| 57 | 102924 | | P | 57 | 132911 | 0 | 5.90E-25 | |
| 63 | 41035 | | F | 63 | 183559 | -2 | 2.53E-24 | |
| 58 | 29041 | | P | 58 | 183564 | -1 | 2.57E-23 | |
| 64 | 102716 | | P | 64 | 133109 | -3 | 4.05E-23 | |
| 57 | 133246 | | F | 57 | 183064 | -1 | 1.01E-22 | |
| 52 | 40968 | | P | 52 | 143938 | 0 | 6.04E-22 | |
| 61 | 60187 | | F | 61 | 92873 | -3 | 2.24E-21 | |
| 49 | 40346 | | P | 49 | 162342 | 0 | 3.87E-20 | |
| 49 | 53090 | | P | 49 | 124065 | 0 | 3.87E-20 | |
| 49 | 71235 | | P | 49 | 160940 | 0 | 3.87E-20 | |
| 57 | 102655 | | P | 57 | 133177 | -3 | 4.66E-19 | |
| 50 | 110992 | | P | 50 | 159558 | -1 | 1.45E-18 | |
| 49 | 89335 | | F | 49 | 89462 | -1 | 5.69E-18 | |
| 50 | 60275 | | P | 50 | 176604 | -2 | 1.07E-16 | |
| 43 | 11028 | | P | 43 | 159494 | 0 | 1.58E-16 | |
| 43 | 172595 | | F | 43 | 177865 | 0 | 1.58E-16 | |
| 46 | 73352 | | F | 46 | 171645 | -1 | 3.42E-16 | |
| 46 | 167904 | | P | 46 | 176797 | -1 | 3.42E-16 | |
| 52 | 40087 | | P | 52 | 138508 | -3 | 3.61E-16 | |
| 52 | 40101 | | P | 52 | 138494 | -3 | 3.61E-16 | |
| 42 | 44475 | | F | 42 | 123394 | 0 | 6.34E-16 | |
| 41 | 60203 | | F | 41 | 92889 | 0 | 2.54E-15 | |
| 40 | 69707 | | F | 40 | 137469 | 0 | 1.01E-14 | |
| 40 | 111002 | | P | 40 | 159558 | 0 | 1.01E-14 | |
| 39 | 69155 | | P | 39 | 116868 | 0 | 4.06E-14 | |
| 38 | 72625 | | P | 38 | 74621 | 0 | 1.62E-13 | |
| 38 | 91283 | | F | 38 | 91355 | 0 | 1.62E-13 | |
| 41 | 36247 | | P | 41 | 125074 | -1 | 3.12E-13 | |
| 41 | 88979 | | F | 41 | 187314 | -1 | 3.12E-13 | |
| 37 | 18095 | | F | 37 | 190786 | 0 | 6.49E-13 | |
| 37 | 89347 | | F | 37 | 89474 | 0 | 6.49E-13 | |
| 37 | 125434 | | F | 37 | 125470 | 0 | 6.49E-13 | |
| 36 | 103052 | | P | 36 | 132799 | 0 | 2.60E-12 | |
| 35 | 60290 | | P | 35 | 176604 | 0 | 1.04E-11 | |
| 34 | 50845 | | P | 34 | 50845 | 0 | 4.15E-11 | |
| 43 | 62481 | | F | 43 | 142933 | -3 | 5.28E-11 | |
| 43 | 63272 | | P | 43 | 100210 | -3 | 5.28E-11 | |
| 43 | 102868 | | P | 43 | 132978 | -3 | 5.28E-11 | |
| 43 | 184361 | | P | 43 | 190673 | -3 | 5.28E-11 | |
| 40 | 3787 | | F | 40 | 190026 | -2 | 7.12E-11 | |
| 40 | 78037 | | F | 40 | 151214 | -2 | 7.12E-11 | |
| 40 | 81807 | | F | 40 | 81846 | -2 | 7.12E-11 | |
| 40 | 90315 | | P | 40 | 151214 | -2 | 7.12E-11 | |
| 37 | 147651 | | F | 37 | 177896 | -1 | 7.20E-11 | |
| 33 | 28474 | | P | 33 | 69096 | 0 | 1.66E-10 | |
| 42 | 51211 | | F | 42 | 142515 | -3 | 1.96E-10 | |
| 36 | 102676 | | P | 36 | 133177 | -1 | 2.80E-10 | |
| 38 | 16475 | | P | 38 | 201990 | -2 | 1.03E-09 | |
| 38 | 90127 | | P | 38 | 201990 | -2 | 1.03E-09 | |
| 35 | 73493 | | F | 35 | 101222 | -1 | 1.09E-09 | |
| 31 | 17200 | | F | 31 | 89563 | 0 | 2.66E-09 | |
| 40 | 90377 | | P | 40 | 132755 | -3 | 2.71E-09 | |
| 40 | 90377 | | F | 40 | 176877 | -3 | 2.71E-09 | |
| 40 | 177813 | | F | 40 | 184346 | -3 | 2.71E-09 | |
| 37 | 40116 | | P | 37 | 138494 | -2 | 3.89E-09 | |
| 39 | 61848 | | F | 39 | 203226 | -3 | 1E-08 | |
| 39 | 102989 | | P | 39 | 132864 | -3 | 1E-08 | |
| 30 | 11601 | | P | 30 | 41701 | 0 | 1.06E-08 | |
| 30 | 26410 | | P | 30 | 137391 | 0 | 1.06E-08 | |
| 30 | 42592 | | P | 30 | 148472 | 0 | 1.06E-08 | |
| 30 | 55895 | | P | 30 | 57636 | 0 | 1.06E-08 | |
| 33 | 11274 | | F | 33 | 137790 | -1 | 1.64E-08 | |
| 38 | 62204 | | F | 38 | 79351 | -3 | 3.7E-08 | |
| 38 | 73727 | | F | 38 | 132796 | -3 | 3.7E-08 | |
| 32 | 78045 | | F | 32 | 151222 | -1 | 6.38E-08 | |
| 37 | 77911 | | F | 37 | 151061 | -3 | 1.36E-07 | |
| 34 | 5871 | | F | 34 | 21471 | -2 | 2.1E-07 | |
| 34 | 12211 | | F | 34 | 142148 | -2 | 2.1E-07 | |
| 34 | 13049 | | F | 34 | 38402 | -2 | 2.1E-07 | |
| 34 | 63300 | | P | 34 | 100191 | -2 | 2.1E-07 | |
| 34 | 73731 | | P | 34 | 103053 | -2 | 2.1E-07 | |
| 31 | 8363 | | F | 31 | 22287 | -1 | 2.47E-07 | |
| 31 | 99811 | | F | 31 | 142245 | -1 | 2.47E-07 | |
| 36 | 90369 | | P | 36 | 132767 | -3 | 0.0000005 | |
| 36 | 90369 | | F | 36 | 176869 | -3 | 0.0000005 | |
| 30 | 12245 | | F | 30 | 189549 | -1 | 9.57E-07 | |
| 30 | 26604 | | F | 30 | 144103 | -1 | 9.57E-07 | |
| 35 | 47553 | | F | 35 | 71555 | -3 | 1.84E-06 | |
| 32 | 90375 | | P | 32 | 151154 | -2 | 2.97E-06 | |
| 32 | 100187 | | P | 32 | 117119 | -2 | 2.97E-06 | |
| 32 | 111105 | | F | 32 | 133386 | -2 | 2.97E-06 | |
| 34 | 30504 | | F | 34 | 32324 | -3 | 6.71E-06 | |
| 34 | 60383 | | F | 34 | 176553 | -3 | 6.71E-06 | |
| 34 | 137787 | | P | 34 | 138559 | -3 | 6.71E-06 | |
| 31 | 61856 | | F | 31 | 203234 | -2 | 0.0000111 | |
| 31 | 61912 | | F | 31 | 203271 | -2 | 0.0000111 | |
| 31 | 81102 | | R | 31 | 81102 | -2 | 0.0000111 | |
| 31 | 102880 | | P | 31 | 132978 | -2 | 0.0000111 | |
| 31 | 117906 | | F | 31 | 192415 | -2 | 0.0000111 | |
| 31 | 169893 | | P | 31 | 207269 | -2 | 0.0000111 | |
| 30 | 8035 | | F | 30 | 8056 | -2 | 0.0000416 | |
| 30 | 32150 | | F | 30 | 32178 | -2 | 0.0000416 | |
| 30 | 62261 | | F | 30 | 79408 | -2 | 0.0000416 | |
| 30 | 62494 | | F | 30 | 142946 | -2 | 0.0000416 | |
| 30 | 72733 | | P | 30 | 141995 | -2 | 0.0000416 | |
| 30 | 90387 | | P | 30 | 132755 | -2 | 0.0000416 | |
| 30 | 90387 | | F | 30 | 176887 | -2 | 0.0000416 | |
| 30 | 142901 | | P | 30 | 201266 | -2 | 0.0000416 | |
| 32 | 35512 | | F | 32 | 201983 | -3 | 0.000089 | |
| 31 | 11599 | | P | 31 | 157491 | -3 | 0.000323 | |
| 31 | 12219 | | F | 31 | 70645 | -3 | 0.000323 | |
| 31 | 63303 | | F | 31 | 117116 | -3 | 0.000323 | |
| 31 | 70171 | | F | 31 | 143320 | -3 | 0.000323 | |
| 31 | 102856 | | P | 31 | 133002 | -3 | 0.000323 | |
| 31 | 132825 | | F | 31 | 182899 | -3 | 0.000323 | |
| 31 | 184376 | | P | 31 | 190670 | -3 | 0.000323 | |
| 30 | 11318 | | P | 30 | 204700 | -3 | 0.00117 | |
| 30 | 17224 | | F | 30 | 89546 | -3 | 0.00117 | |
| 30 | 26092 | | F | 30 | 194955 | -3 | 0.00117 | |
| 30 | 70878 | | F | 30 | 177997 | -3 | 0.00117 | |
| 30 | 102614 | | P | 30 | 183063 | -3 | 0.00117 | |
| 30 | 137842 | | P | 30 | 176582 | -3 | 0.00117 | |
| 30 | 177828 | | P | 30 | 190686 | -3 | 0.00117 | |

**Supplementary Table 8.** The homologous DNA fragment in the mitogenome of white-rayed *C. indicum*.

| Number | MTPT1 | MTPT2 | MTPT3 | | MTPT4 |
| --- | --- | --- | --- | --- | --- |
| Mitochondrial genome | mtDNA in white *C. indicum* | | | | |
| % Identity | 97.5 | 97.468 | 96.429 | 96.429 | 87.121 |
| Alignment Length | 80 | 79 | 84 | 84 | 1087 |
| Mismatches | 2 | 2 | 2 | 2 | 86 |
| Gap Openings | 0 | 0 | 1 | 1 | 29 |
| Alignment start (chloroplast genome) | 112 | 52012 | 106939 | 127098 | 64618 |
| Alignment end (chloroplast genome) | 191 | 52090 | 107021 | 127180 | 65688 |
| Alignment start (mitochondrial genome) | 24237 | 152732 | 190099 | 190016 | 179310 |
| Alignment end (mitochondrial genome) | 24316 | 152810 | 190016 | 190099 | 178262 |
| E-value | 1.06E-31 | 3.81E-31 | 1.1E-31 | 1.1E-31 | 0 |
| Bit Score | 137 | 135 | 137 | 137 | 1182 |
| MTPT annotation | complete trnH-GUG | complete trnM-CAU | complete trnN-GUU | complete trnN-GUU | complete petL exon1;complete petG exon1;complete trnW-CCA;complete trnP-UGG |

**Supplementary Table** 9. The homologous DNA fragment in the mitogenome of yellow-rayed *C. indicum*.

| Number | MTPT1 | MTPT2 | MTPT3 | | MTPT4 |
| --- | --- | --- | --- | --- | --- |
| Mitochondrial genome | mtDNA in yellow *C. indicum* | | | | |
| % Identity | 97.5 | 97.468 | 96.429 | 96.429 | 87.8 |
| Alignment Length | 80 | 79 | 84 | 84 | 1082 |
| Mismatches | 2 | 2 | 2 | 2 | 83 |
| Gap Openings | 0 | 0 | 1 | 1 | 28 |
| Alignment start (chloroplast genome) | 112 | 52013 | 106940 | 127099 | 64619 |
| Alignment end (chloroplast genome) | 191 | 52091 | 107022 | 127181 | 65689 |
| Alignment start (mitochondrial genome) | 24238 | 152733 | 190095 | 190012 | 179306 |
| Alignment end (mitochondrial genome) | 24317 | 152811 | 190012 | 190095 | 178263 |
| E-value | 1.10E-31 | 3.81E-31 | 1.06E-31 | 1.06E-31 | 0.00E+00 |
| Bit Score | 137 | 135 | 137 | 137 | 1221 |
| MTPT annotation | complete trnH-GUG | complete trnM-CAU | complete trnN-GUU | complete trnN-GUU | complete petL exon1;complete petG exon1;complete trnW-CCA;complete trnP-UGG |

**Supplementary Table 10.** The information of 37 species constituting the phylogenetic tree.

|  | Species | Accession numbers |
| --- | --- | --- |
| Asteraceae | White *Chrysanthemum indicum* | PP350832 |
| Yellow *Chrysanthemum indicum* | PP350833 |
| *Chrysanthemum indicum* (2x) | OQ835564.1 |
|  | *Chrysanthemum indicum* (4x) | OQ835565.1 |
| *Chrysanthemum indicum* var. aromaticum | OQ835568.1 |
| *Chrysanthemum boreale* | NC_039757.1 |
| *Chrysanthemum indicum* | MH716014.1 |
| *Chrysanthemum x morifolium* | NC_073151.1 |
| *Chrysanthemum zawadskii* | ON053202.1 |
| *Bidens alba var. radiata* | MW838194.1 |
| *Bidens bipinnata* | NC_060635.1 |
| *Bidens parviflora* | NC_062670.1 |
| *Bidens pilosa* | NC_062673.1 |
| *Bidens tripartita* | NC_062671.1 |
| *Helianthus annuus* | NC_023337.1 |
| *Helianthus argophyllus* | NC_072973.1 |
| *Helianthus grosseserratus* | NC_051989.1 |
| *Helianthus occidentalis* | NC_058584.1 |
| *Helianthus strumosus* | NC_051990.1 |
| *Helianthus tuberosus* | NC_058585.1 |
| *Lactuca saligna* strainCGN5271 | NC_042406.1 |
| *Lactuca sativa* cultivar Salinas | NC_042756.1 |
| *Lactuca serriola* | NC_042378.1 |
| *Lactuca virosa strain* LAC006941 | MZ159959.1 |
| *Paraprenanthes diversifolia* | MN661146.1 |
| *Saussurea costus* | NC_059793.1 |
| *Saussurea inversa* | NC_066407.1 |
| *Arctium lappa* | NC_058644.1 |
| *Arctium tomentosum* | NC_058643.1 |
| *Ageratum conyzoides* | NC_053927.1 |
| *Erigeron annuus* chromosome 1-2 | ON507989_90.1 |
| *Diplostephium hartwegii* voucher TEX:Vargas 456 | NC_034354.1 |
| *Taraxacum mongolicum* | NC_067879.1 |
| *Cichorium intybus* | NC_069590.1 |
| *Carthamus tinctorius* | OQ621745.1 |
| Campanulaceae | *Codonopsis lanceolata* | NC_037949.1 |
| *Platycodon grandiflorus* | NC_035958.1 |
